# Supplementary material for: Synthesis and anisotropic self-assembly of Ag nanoparticles immobilized by the Pluronic F127 triblock copolymer for colorimetric detection of H2O2
Source: Royal Society of Chemistry journal article supplement (doi:10.1039/c5ra20457g), 2015-01-01
Supplement: c5ra20457g1.pdf [file c5ra20457g1.pdf]

# Synthesis and anisotropic self-assembly of Ag nanoparticles immobilized by Pluronic F127 triblock copolymer for colorimetric detection of H<sub>2</sub>O<sub>2</sub>†

Cong Wu<sup>a</sup>, Guangmei Xia<sup>b</sup>, Jing Sun<sup>c</sup>, Rui Song<sup>\*a</sup>

*a* College of Chemistry and Chemical Engineering, University of Chinese Academy of Sciences, Beijing 100049, China

*b* Beijing National Laboratory for Molecular Sciences, CAS Key Laboratory of Engineering Plastics, Institute of Chemistry, Chinese Academy of Sciences, Beijing 100190, China

*c* Shanghai Institute of Microsystem and Information Technology, Chinese Academy of Sciences, Shanghai 200050, China

## 1. Experimental

F127 micelles, Ag@DA system and Ag@NaBH<sub>4</sub>@F127 system are prepared as the contrast.

### Preparation of F127 micelles

In a typical synthesis, 10mg of F127 was added to 10mL ultrapure water and dissolved with continuous magnetic stirring at 60° C for 12 h, the resultant F127 solution was incubated at 60° C for 24 h without agitation. The obtained colourless transparent solution was cooled at room temperature just after the reaction.

### Preparation of Ag@DA system

200μL dopamine hydrochloride (4.42 mmol L<sup>-1</sup>) and 100μL sodium hydroxide (0.1 mol L<sup>-1</sup>) were sequentially added to 10mL ultrapure water in order to form a reducing environment. After 20 min, AgNO<sub>3</sub> (8 mmol L<sup>-1</sup>) was added dropwise to the above solution with stirring slowly. Immediately, the solution color turned from colorless to yellow, suggesting the formation of Ag@DA system.

### Preparation of Ag@NaBH<sub>4</sub>@F127 system

200 $\mu$ L NaBH<sub>4</sub> (10 mmol L<sup>-1</sup>) was added to 10mL prepared F127 micelles in order to form a reducing environment. AgNO<sub>3</sub> (8 mmol L<sup>-1</sup>) was added dropwise to the above solution with vigorous stirring. Immediately, the solution color turned from colorless to yellow, suggesting the formation of Ag@NaBH<sub>4</sub>@F127 system.

## 2. Results

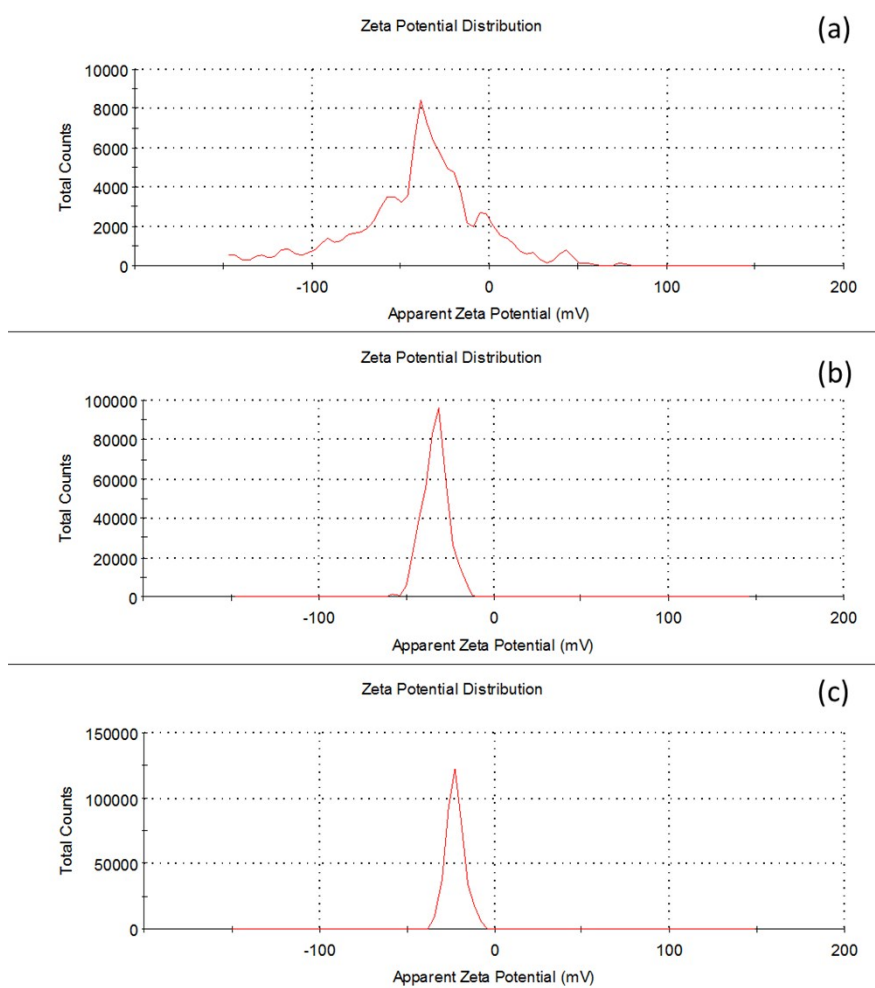

**Fig. S1** Zeta potential of (a) Ag@DA system; (b) F127 micelles and (c) Ag@DA@F127 system.

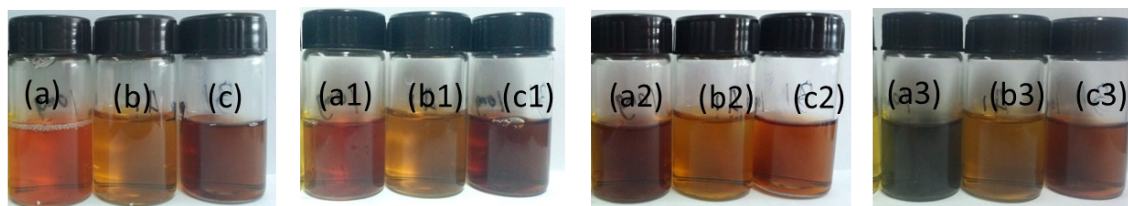

**Fig. S2** Photographs of fresh (a) Ag@NaBH<sub>4</sub>@F127; (b) Ag@DA and (c) Ag@DA@F127 aqueous solutions. (a1); (b1) and (c1) are the corresponding solutions stand for 1 h. (a2); (b2) and (c2) are the corresponding solutions stand for 12 h. (a3); (b3) and (c3) are the corresponding solutions stand for 24 h.

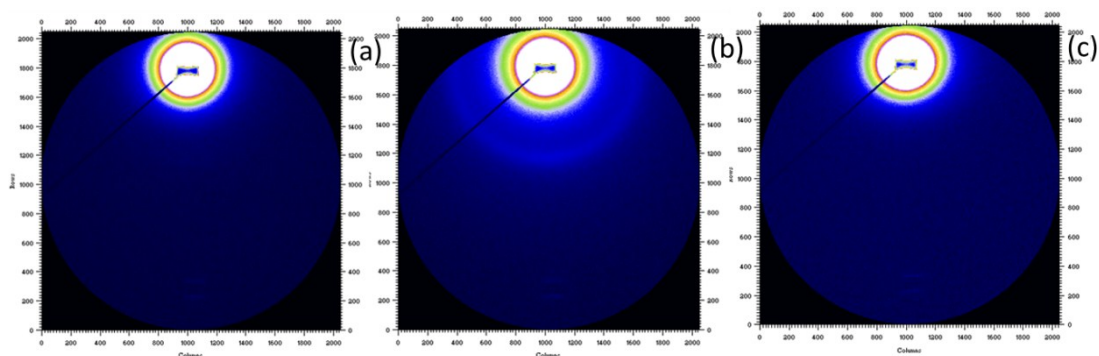

**Fig. S3** 2D SAXS patterns of (a) Ag@DA system; (b) and (c) Ag@DA@F127 system.

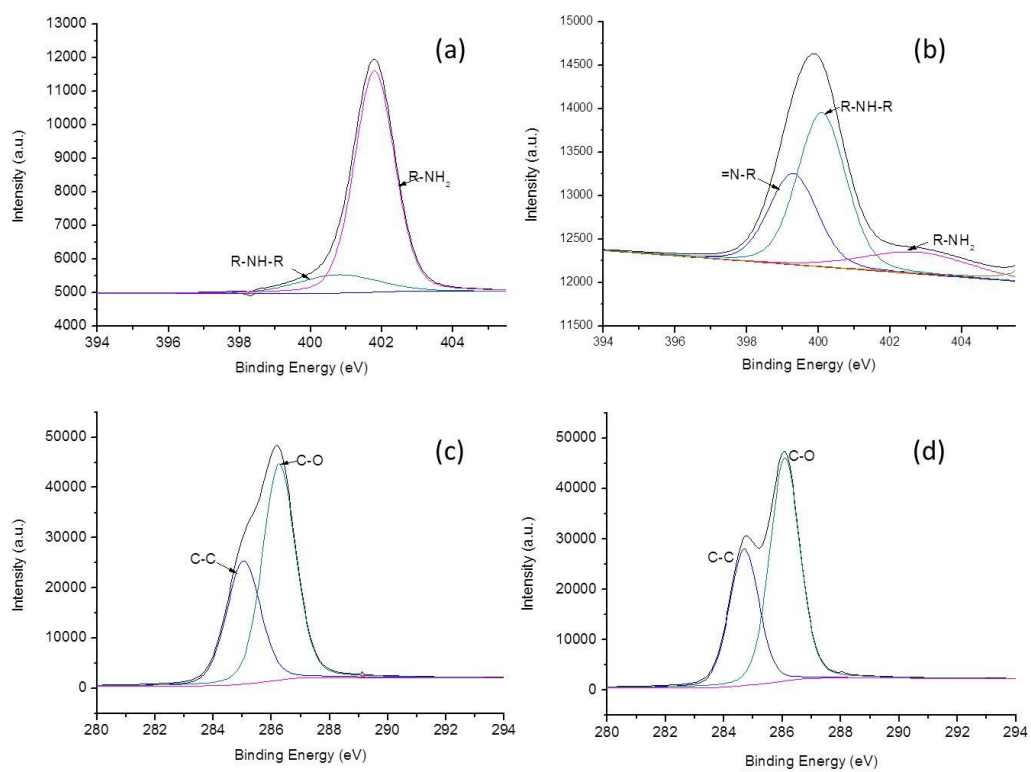

**Fig. S4** N1s XPS spectra of (a) pure DA (b) Ag@DA system (65/35 wt. %); C1s XPS spectra of (c) F127 micelles and (d) Ag@DA@F127 system (2.6/1.4/96 wt. %).

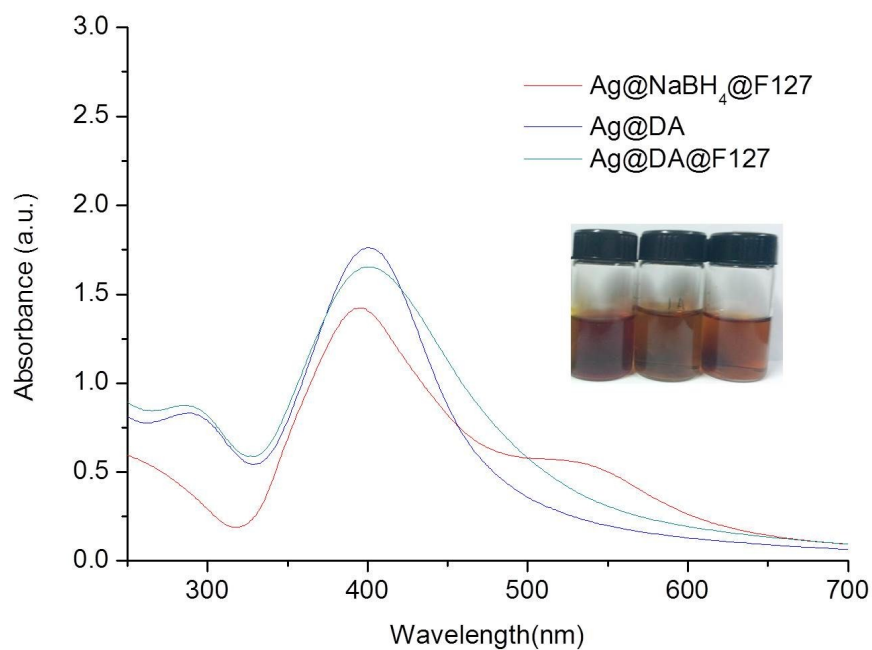

**Fig. S5** UV-vis absorption spectra of fresh Ag@NaHB<sub>4</sub>, Ag@NaHB<sub>4</sub>@F127, Ag@DA and Ag@DA@F127 aqueous solutions; Inset: photographs of Ag@NaHB<sub>4</sub>@F127, Ag@DA and Ag@DA@F127 aqueous solutions (from left to right).

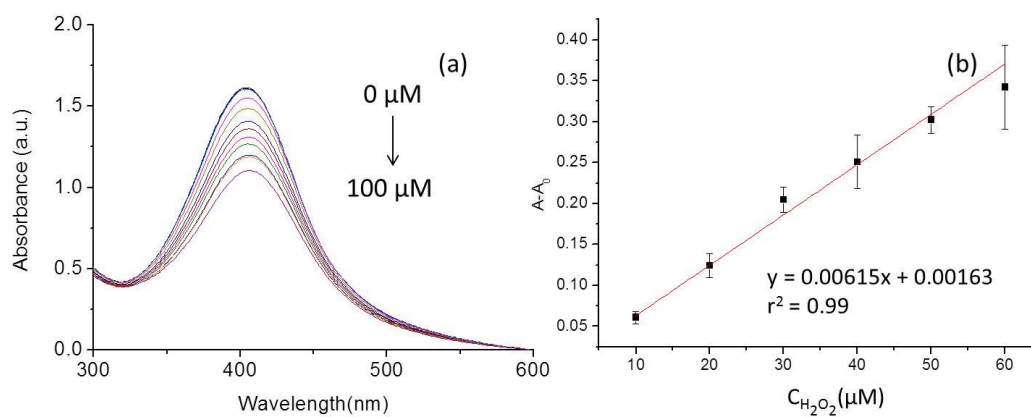

**Fig. S6** (a) UV–vis absorption spectra of Ag@DA system in the presence of 0, 0.1, 1.0, 5, 10, 20, 30, 40, 50, 60, 70, 80, and 100  $\mu\text{M}$   $\text{H}_2\text{O}_2$ ; (b) plot of absorbance decrease versus  $\text{H}_2\text{O}_2$  concentration (10~60  $\mu\text{M}$ ).
